# Supplementary material for: Prion Switching in Response to Environmental Stress
Source: PubMed Central journal article supplement (PMC2586387; doi:10.1371/journal.pbio.0060294), 2008-11-25

## Reduced toxicity PD-YFP overexpression

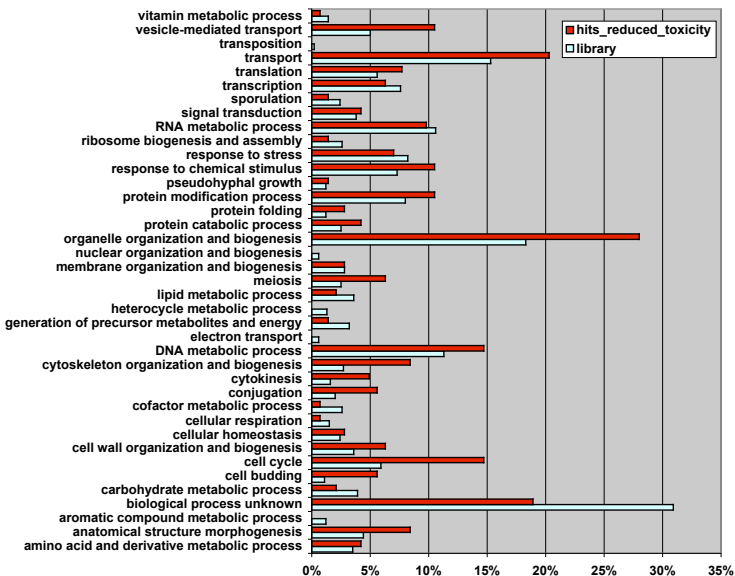

## Enhanced toxicity PD-YFP overexpression

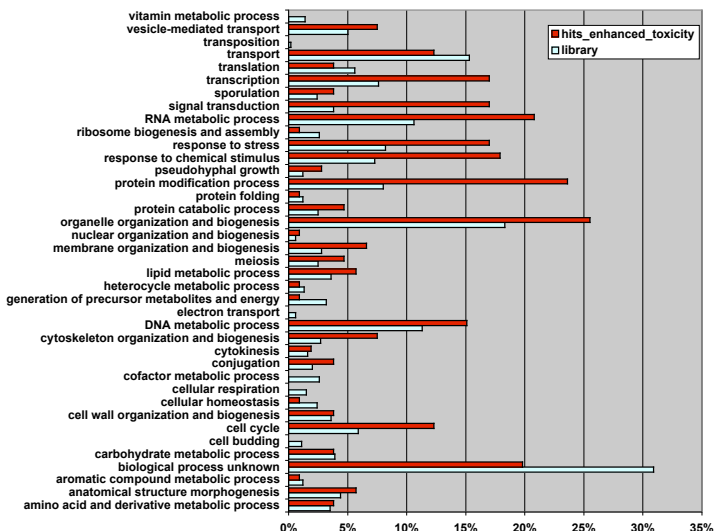

Supplement: pbio.0060294.sg001.pdf [file pbio.0060294.sg001.pdf]
