# Supplementary material for: Prion Switching in Response to Environmental Stress
Source: PLoS Biol. 2008 Nov 25;6(11):e294. doi: 10.1371/journal.pbio.0060294 (PMC2586387; doi:10.1371/journal.pbio.0060294)
Supplement: Table S3 — (36 KB XLS) [file pbio.0060294.st003.xls]

## Sheet: Sheet1
Table S3: Summary table of conditions tested for their effect on the induction frequency of [PSI+]
high salt concentrations (M)			oxidative stress (mM)			high temperatures
LiCl	0.5, 1, 2		menadione	0.1		30C
ZnSO4	1		H2O2	5		39C
NH4Cl	1		H2O2	10		40C
NH4Acetate	1		H2O2 shock*	10		41C
NaCl	1, 1.5, 1.75		H2O2 shock*	50		42C
MnCl2	0.5, 1					43C
MgSO4	1		ER stress (mM)			37C heat shock**
MgCl2	1		DTT	4		42C heat shock**
Mg Acetate	1		DTT	8		46C heat shock**
KH2PO4	0.5, 1, 2		DTT	12		50C heat shock**
K Acetate	1		DTT shock*	200
CaCl2	1
KCl	0.2, 1, 1.5, 2		*shock for 1 hr		**heat shock for 20 or 40 min
